# Supplementary material for: Enhancer-associated H3K4 methylation safeguards in vitro germline competence
Source: PubMed Central journal article supplement (PMC8486853; doi:10.1038/s41467-021-26065-6), 2021-10-01
Supplement: 41467_2021_26065_MOESM3_ESM.pdf [file 41467_2021_26065_MOESM3_ESM.pdf]

## Description of Additional Supplementary Files

**File Name:** Supplementary Data 1

**Description:** UMI count matrix of all cells analyzed across different stages of PGCLC differentiation.

**File Name:** Supplementary Data 2

**Description:** ESC, EpiLC, EpiSC and PGCLC gene sets based on single-cell RNA-seq profiling across different stages of PGCLC differentiation.

**File Name:** Supplementary Data 3

**Description:** EpiLC, EpiSC and PGCLC enhancers coordinates and linked genes.

**File Name:** Supplementary Data 4

**Description:** RNA-seq results in WT vs MII3/4 dCD cells.

**File Name:** Supplementary Data 5

**Description:** UMI count matrix of all cells analyzed from d4 EB (WT & dCD).

**File Name:** Supplementary Data 6

**Description:** Resources
