# Supplementary material for: Enhancer-associated H3K4 methylation safeguards in vitro germline competence
Source: PubMed Central journal article supplement (PMC8486853; doi:10.1038/s41467-021-26065-6), 2021-10-01
Supplement: 41467_2021_26065_MOESM10_ESM.pdf [file 41467_2021_26065_MOESM10_ESM.pdf]

## Reporting Summary

Nature Portfolio wishes to improve the reproducibility of the work that we publish. This form provides structure for consistency and transparency in reporting. For further information on Nature Portfolio policies, see our [Editorial Policies](#) and the [Editorial Policy Checklist](#).

### Statistics

For all statistical analyses, confirm that the following items are present in the figure legend, table legend, main text, or Methods section.

- |                                     |                                                                                                                                                                                                                                                                                                |
|-------------------------------------|------------------------------------------------------------------------------------------------------------------------------------------------------------------------------------------------------------------------------------------------------------------------------------------------|
| n/a                                 | Confirmed                                                                                                                                                                                                                                                                                      |
| <input type="checkbox"/>            | <input checked="" type="checkbox"/> The exact sample size ( <i>n</i> ) for each experimental group/condition, given as a discrete number and unit of measurement                                                                                                                               |
| <input type="checkbox"/>            | <input checked="" type="checkbox"/> A statement on whether measurements were taken from distinct samples or whether the same sample was measured repeatedly                                                                                                                                    |
| <input type="checkbox"/>            | <input checked="" type="checkbox"/> The statistical test(s) used AND whether they are one- or two-sided<br><i>Only common tests should be described solely by name; describe more complex techniques in the Methods section.</i>                                                               |
| <input checked="" type="checkbox"/> | <input type="checkbox"/> A description of all covariates tested                                                                                                                                                                                                                                |
| <input checked="" type="checkbox"/> | <input type="checkbox"/> A description of any assumptions or corrections, such as tests of normality and adjustment for multiple comparisons                                                                                                                                                   |
| <input type="checkbox"/>            | <input checked="" type="checkbox"/> A full description of the statistical parameters including central tendency (e.g. means) or other basic estimates (e.g. regression coefficient) AND variation (e.g. standard deviation) or associated estimates of uncertainty (e.g. confidence intervals) |
| <input type="checkbox"/>            | <input checked="" type="checkbox"/> For null hypothesis testing, the test statistic (e.g. <i>F</i> , <i>t</i> , <i>r</i> ) with confidence intervals, effect sizes, degrees of freedom and <i>P</i> value noted<br><i>Give P values as exact values whenever suitable.</i>                     |
| <input checked="" type="checkbox"/> | <input type="checkbox"/> For Bayesian analysis, information on the choice of priors and Markov chain Monte Carlo settings                                                                                                                                                                      |
| <input checked="" type="checkbox"/> | <input type="checkbox"/> For hierarchical and complex designs, identification of the appropriate level for tests and full reporting of outcomes                                                                                                                                                |
| <input type="checkbox"/>            | <input checked="" type="checkbox"/> Estimates of effect sizes (e.g. Cohen's <i>d</i> , Pearson's <i>r</i> ), indicating how they were calculated                                                                                                                                               |

*Our web collection on [statistics for biologists](#) contains articles on many of the points above.*

### Software and code

Policy information about [availability of computer code](#)

#### Data collection

RT-qPCR: Light Cycler 480II  
FACS: FACS Canto II Cytometer / FACS AriaIII cell sorter with BD FACSDiva Software (version 5.0.3)  
Next-generation sequencing: NovaSeq 6000 System (Illumina)

#### Data analysis

All analysis code is available at Github: [https://github.com/ToreBle/Germline\\_competence](https://github.com/ToreBle/Germline_competence)  
Furthermore the following programmes and R packages were used for the data analysis:  
AnnotationHub 2.18.0  
bedtools 2.29.2  
BISMA  
Bismark v0.16.1  
bowtie2 2.2.9  
BUSpaRse 1.0.0  
bwa 0.7.15  
cellranger 2.1.0  
cutadapt 2.8  
deeptools 3.3.1  
DESeq2 1.26.0  
edgeR 3.28.1  
FlowJo 10.6.1  
GREAT 4.0.4  
kallisto 0.46.2  
Loupe Browser 4.2.0

macs2 2.2.6  
 monocle 2.14.0  
 novoalignCS V1.06.09  
 picard 2.5.0  
 R 3.6.1  
 Seurat 3.9.9.9035  
 STAR 2.2.1  
 velocyto.R 0.6  
 samtools 1.3.1  
 Trim Galore 0.4.2  
 UCSC Genome Browser

For manuscripts utilizing custom algorithms or software that are central to the research but not yet described in published literature, software must be made available to editors and reviewers. We strongly encourage code deposition in a community repository (e.g. GitHub). See the Nature Portfolio [guidelines for submitting code & software](#) for further information.

## Data

Policy information about [availability of data](#)

All manuscripts must include a [data availability statement](#). This statement should provide the following information, where applicable:

- Accession codes, unique identifiers, or web links for publicly available datasets
- A description of any restrictions on data availability
- For clinical datasets or third party data, please ensure that the statement adheres to our [policy](#)

The sequencing datasets generated during this study are available through GEO (GSE155089): <https://www.ncbi.nlm.nih.gov/geo/query/acc.cgi?acc=GSE155089>

All data are the different types of genomic data (i.e. ChIP-seq, ATAC-seq, genome-wide bisulfite sequencing (WGBS), 4C-seq, RNA-seq and single-cell RNA-seq) can be directly accessed using the following GEO accession numbers:

GSE155015 4C-seq  
 GSE155058 ATAC-seq  
 GSE155062 ChIP-seq 1  
 GSE155069 ChIP-seq 2  
 GSE155079 RNA-seq  
 GSE155083 WGBS  
 GSE155088 scRNA-seq

## Field-specific reporting

Please select the one below that is the best fit for your research. If you are not sure, read the appropriate sections before making your selection.

☒ Life sciences ☐ Behavioural & social sciences ☐ Ecological, evolutionary & environmental sciences

For a reference copy of the document with all sections, see [nature.com/documents/nr-reporting-summary-flat.pdf](https://www.nature.com/documents/nr-reporting-summary-flat.pdf)

## Life sciences study design

All studies must disclose on these points even when the disclosure is negative.

|                 |                                                                                                                                                                                                                                                                                                                                                       |
|-----------------|-------------------------------------------------------------------------------------------------------------------------------------------------------------------------------------------------------------------------------------------------------------------------------------------------------------------------------------------------------|
| Sample size     | No statistical methods were used to predetermine sample size. For the transgenic ESC lines generated for this study, at least two clonal lines with the same genotype were analyzed. As this resulted in similar results, we decided to keep a minimum of two clonal lines for all investigated transgenic ESC.                                       |
| Data exclusions | No data was excluded.                                                                                                                                                                                                                                                                                                                                 |
| Replication     | All experiments were performed independently at least twice and all the attempts at data replication were successful. The exact number of replicates is described in the corresponding figure legends.                                                                                                                                                |
| Randomization   | Randomization was not relevant for our study as the sample sizes of the different experiments were too small for randomization.                                                                                                                                                                                                                       |
| Blinding        | The investigators were not blinded to allocation during experiments and outcome assessment. There was one person in charge of generating and characterizing all cell lines and performing bioinformatical analysis. Blinding is typically used with randomization and large sample sizes, which, as stated before, does not apply to our experiments. |

## Reporting for specific materials, systems and methods

We require information from authors about some types of materials, experimental systems and methods used in many studies. Here, indicate whether each material, system or method listed is relevant to your study. If you are not sure if a list item applies to your research, read the appropriate section before selecting a response.

## Materials &amp; experimental systems

|                                     |                                                           |
|-------------------------------------|-----------------------------------------------------------|
| n/a                                 | Involved in the study                                     |
| <input type="checkbox"/>            | <input checked="" type="checkbox"/> Antibodies            |
| <input type="checkbox"/>            | <input checked="" type="checkbox"/> Eukaryotic cell lines |
| <input checked="" type="checkbox"/> | <input type="checkbox"/> Palaeontology and archaeology    |
| <input checked="" type="checkbox"/> | <input type="checkbox"/> Animals and other organisms      |
| <input checked="" type="checkbox"/> | <input type="checkbox"/> Human research participants      |
| <input checked="" type="checkbox"/> | <input type="checkbox"/> Clinical data                    |
| <input checked="" type="checkbox"/> | <input type="checkbox"/> Dual use research of concern     |

## Methods

|                                     |                                                    |
|-------------------------------------|----------------------------------------------------|
| n/a                                 | Involved in the study                              |
| <input type="checkbox"/>            | <input checked="" type="checkbox"/> ChIP-seq       |
| <input type="checkbox"/>            | <input checked="" type="checkbox"/> Flow cytometry |
| <input checked="" type="checkbox"/> | <input type="checkbox"/> MRI-based neuroimaging    |

## Antibodies

## Antibodies used

Antibody Source ID Application Dilution

H3K4me1 Active Motif 39297 ChIP-seq 4 µl

H3K4me2 Active Motif 39141 ChIP-seq 4 µl

H3K4me3 Active Motif 39159 ChIP-seq 4 µl

H3K9me2 Active Motif 39683 ChIP-seq 5 µl

H3K9me3 Active Motif 39161 ChIP-seq 5 µl

H3K27ac Active Motif 39133 ChIP-seq 4 µl

H3K27me2 Cell Signaling 9728S ChIP-seq 5 µl

H3K27me3 Active Motif 39155 ChIP-seq 5 µl

HA Abcam ab9110 ChIP-seq 4 µl

HA-tag Abcam ab9110 Western Blot 1:5000

NANOG Bethyl A300-397A Western Blot 1:2000

ESRRB Perseus Proteomics PP-H6705-00 Western Blot 1:1000

OTX2 Proteintech 13497-1-AP Western Blot 1:1500

B-TUBULIN Sigma-Aldrich T0198 Western Blot 1:2000

CD15 Biolegend 104307 FACS 1:500

CD61 Thermo Fisher Scientific 50-8813-41 FACS 1:200

## Validation

H3K4me1: <https://www.activemotif.com/catalog/details/39297/histone-h3-monomethyl-lys4-antibody-pab>

H3K4me2: <https://www.activemotif.com/catalog/details/39141/histone-h3-dimethyl-lys4-antibody-pab>

H3K4me3: <https://www.activemotif.com/catalog/details/39159/histone-h3-trimethyl-lys4-antibody-pab>

H3K9me2: <https://www.activemotif.com/catalog/details/39683/histone-h3-dimethyl-lys9-antibody-mab-clone-mabi-0307>

H3K9me3: <https://www.activemotif.com/catalog/details/39161/histone-h3-trimethyl-lys9-antibody-pab>

H3K27ac: <https://www.activemotif.com/catalog/details/39133/histone-h3-acetyl-lys27-antibody-pab>

H3K27me2: <https://www.cellsignal.com/products/primary-antibodies/di-methyl-histone-h3-lys27-d18c8-xp-rabbit-mab/9728?N=4294956287&Ntt=9728S&fromPage=plp>

H3K27me3: <https://www.activemotif.com/catalog/details/39155/histone-h3-trimethyl-lys27-antibody-pab>

HA: <https://www.abcam.com/ha-tag-antibody-chip-grade-ab9110.html>

NANOG: [https://www.bethyl.com/product/A300-397A/Nanog\\_Antibody](https://www.bethyl.com/product/A300-397A/Nanog_Antibody)

ESRRB: [https://www.bio-technie.com/p/antibodies/human-err-beta-nr3b2-antibody-h6705\\_pp-h6705-00#technical-data-tab-tab](https://www.bio-technie.com/p/antibodies/human-err-beta-nr3b2-antibody-h6705_pp-h6705-00#technical-data-tab-tab)

OTX2: <https://www.ptglab.com/products/OTX2-Antibody-13497-1-AP.htm>

B-TUBULIN: <https://www.sigmaaldrich.com/DE/de/product/sigma/t0198>

C15 and CD61: Hayashi and Saitou, 2031 - doi: 10.1038/nprot.2013.090

## Eukaryotic cell lines

## Policy information about cell lines

## Cell line source(s)

Two different male mouse ESC lines (i.e. E14Tg2a and R1) were used as indicated for each particular experiment. All enhancer deletions (Prdm14 E1, Prdm14 E2, Prdm14 E3, Esrrb E1, Klf5 E1 and Lrrc31 E1) were generated in E14Tg2a using CRISPR/Cas9 and the gRNAs described in Supplementary Data 6. For each experiment two clonal lines have been analysed. The Mll3/4 dCD, Mll3/4 dCT and Mll4 CT ESC lines were derived from WT R1 ESC as described in (Dorigi et al., 2017). The R1 Otx2 -/- and dCD Otx2 -/- cell line were generated with a full Otx2 KO using CRISPR/Cas9 in the R1 WT and Mll3/4 dCD cell line, respectively. The E14 Otx2 -/- ESC line (Acampora et al., 2013; Buecker et al., 2014) and its parental E14Tg2a ESC were kindly provided by Christa Buecker.

## Authentication

The enhancer and gene deletions were authenticated by PCR genotyping and Sanger-sequencing. The Otx2 deletions were validated additionally by western blot (Supplementary Fig. S6f) and the amino acid substitutions of Mll3 were confirmed by

Sanger-sequencing. The loss of H3K4me1/2 in dCD and dCT cells was confirmed by ChIP-seq and ChIP-qPCR.

Mycoplasma contamination

The WT E14 mESC have been previously tested; all the remaining ESC lines were not tested.

Commonly misidentified lines  
(See [ICLAC](#) register)

None

## ChIP-seq

### Data deposition

☒ Confirm that both raw and final processed data have been deposited in a public database such as [GEO](#).

☒ Confirm that you have deposited or provided access to graph files (e.g. BED files) for the called peaks.

Data access links

*May remain private before publication.*

<https://www.ncbi.nlm.nih.gov/geo/query/acc.cgi?acc=GSE155089>

Files in database submission

GSM4693166 4C\_Prmd14\_TSS\_ESC  
GSM4693167 4C\_Prmd14\_TSS\_EpiLC  
GSM4693168 4C\_Prmd14\_TSS\_EpiSC  
GSM4694522 ATAC\_input  
GSM4694523 ATAC\_ESC\_rep1  
GSM4694524 ATAC\_ESC\_rep2  
GSM4694525 ATAC\_EpiLC\_rep1  
GSM4694526 ATAC\_EpiLC\_rep2  
GSM4694527 ATAC\_EpiSC\_rep1  
GSM4694528 ATAC\_EpiSC\_rep2  
GSM4694551 H3K4me1\_ESC  
GSM4694552 H3K4me1\_EpiLC  
GSM4694553 H3K4me1\_EpiSC  
GSM4694554 H3K9me2\_ESC  
GSM4694555 H3K9me2\_EpiLC  
GSM4694556 H3K9me2\_EpiSC  
GSM4694557 H3K9me3\_ESC  
GSM4694558 H3K9me3\_EpiLC  
GSM4694559 H3K9me3\_EpiSC  
GSM4694560 H3K27ac\_ESC\_WT  
GSM4694561 H3K27ac\_EpiLC\_WT  
GSM4694562 H3K27ac\_EpiSC\_WT  
GSM4694563 H3K4me2\_ESC  
GSM4694564 H3K4me2\_EpiLC  
GSM4694565 H3K4me2\_EpiSC  
GSM4694566 H3K27me2\_ESC\_WT  
GSM4694567 H3K27me2\_EpiLC\_WT  
GSM4694568 H3K27me2\_EpiSC\_WT  
GSM4694569 ChIP\_input\_ESC  
GSM4694570 ChIP\_input\_EpiLC  
GSM4694571 ChIP\_input\_EpiSC  
GSM4694572 H3K4me3\_ESC  
GSM4694573 H3K4me3\_EpiLC  
GSM4694574 H3K4me3\_EpiSC  
GSM4694575 H3K27me3\_ESC\_WT  
GSM4694576 H3K27me3\_EpiLC\_WT  
GSM4694577 H3K27me3\_EpiSC\_WT  
GSM4694578 HA\_EpiLC\_WT  
GSM4694579 HA\_EpiLC\_Prmd14  
GSM4694580 HA\_EpiLC\_Nanog  
GSM4694581 HA\_EpiSC\_WT  
GSM4694582 HA\_EpiSC\_Prmd14  
GSM4694583 HA\_EpiSC\_Nanog\_rep1  
GSM4694584 HA\_EpiSC\_Nanog\_rep2  
GSM4694585 H3K27ac\_EpiLC\_ctrl  
GSM4694586 H3K4me2\_EpiLC\_ctrl  
GSM4694587 H3K27ac\_EpiLC\_Dox  
GSM4694588 H3K4me2\_EpiLC\_Dox  
GSM4694589 H3K27ac\_EpiSC\_ctrl  
GSM4694590 H3K4me2\_EpiSC\_ctrl  
GSM4694591 H3K27ac\_EpiSC\_Dox  
GSM4694592 H3K4me2\_EpiSC\_Dox

GSM4694701 ChIP\_H3K4me1\_EpiLC\_WT\_rep1  
 GSM4694702 ChIP\_H3K4me1\_EpiLC\_dCD  
 GSM4694703 ChIP\_H3K4me1\_EpiSC\_WT  
 GSM4694704 ChIP\_H3K4me1\_EpiSC\_dCD  
 GSM4694705 ChIP\_H3K27ac\_EpiLC\_WT\_rep1  
 GSM4694706 ChIP\_H3K27ac\_EpiLC\_dCD  
 GSM4694707 ChIP\_H3K27ac\_EpiSC\_WT  
 GSM4694708 ChIP\_H3K27ac\_EpiSC\_dCD  
 GSM4694709 ChIP\_H3K4me1\_ESC\_WT  
 GSM4694710 ChIP\_H3K4me1\_ESC\_dCT  
 GSM4694711 ChIP\_H3K4me1\_EpiLC\_WT\_rep2  
 GSM4694712 ChIP\_H3K4me1\_EpiLC\_dCT  
 GSM4694713 ChIP\_H3K27ac\_ESC\_WT  
 GSM4694714 ChIP\_H3K27ac\_ESC\_dCT  
 GSM4694715 ChIP\_H3K27ac\_EpiLC\_WT\_rep2  
 GSM4694716 ChIP\_H3K27ac\_EpiLC\_dCT  
 GSM4694717 ChIP\_H3K27ac\_d4EB\_WT  
 GSM4694718 ChIP\_H3K27ac\_d4EB\_dCD  
 GSM4694719 ChIP\_H3K4me2\_ESC\_WT  
 GSM4694720 ChIP\_H3K4me2\_ESC\_dCD  
 GSM4694721 ChIP\_H3K4me2\_EpiLC\_WT  
 GSM4694722 ChIP\_H3K4me2\_EpiLC\_dCD  
 GSM4694723 ChIP\_H3K4me2\_EpiSC\_WT  
 GSM4694724 ChIP\_H3K4me2\_EpiSC\_dCD  
 GSM4694725 ChIP\_H3K27ac\_d2EpiLC\_WT  
 GSM4694726 ChIP\_H3K4me1\_d2EpiLC\_WT  
 GSM4694727 ChIP\_H3K4me2\_d2EpiLC\_WT  
 GSM4694728 ChIP\_H3K27ac\_d2EpiLC\_Otx2  
 GSM4694729 ChIP\_H3K4me1\_d2EpiLC\_Otx2  
 GSM4694730 ChIP\_H3K4me2\_d2EpiLC\_Otx2  
 GSM4694731 ChIP\_H3K4me1\_d4EpiSC\_WT  
 GSM4694732 ChIP\_H3K4me2\_d4EpiSC\_WT  
 GSM4694733 ChIP\_H3K4me1\_d4EpiSC\_Otx2  
 GSM4694734 ChIP\_H3K4me2\_d4EpiSC\_Otx2  
 GSM4694735 ChIP\_H3K4me1\_d8EpiSC\_WT  
 GSM4694736 ChIP\_H3K4me2\_d8EpiSC\_WT  
 GSM4694737 ChIP\_H3K4me1\_d8EpiSC\_Otx2  
 GSM4694738 ChIP\_H3K4me2\_d8EpiSC\_Otx2  
 GSM4694849 RNA\_EpiLC\_WT\_rep1  
 GSM4694850 RNA\_EpiLC\_WT\_rep2  
 GSM4694851 RNA\_EpiLC\_dCD\_rep1  
 GSM4694852 RNA\_EpiLC\_dCD\_rep2  
 GSM4694853 RNA\_EpiSC\_WT\_rep1  
 GSM4694854 RNA\_EpiSC\_WT\_rep2  
 GSM4694855 RNA\_EpiSC\_dCD\_rep1  
 GSM4694856 RNA\_EpiSC\_dCD\_rep2  
 GSM4694889 PBAT\_EpiLC\_WT  
 GSM4694890 PBAT\_EpiLC\_Otx2  
 GSM4694891 PBAT\_EpiLC\_dCD  
 GSM4694892 PBAT\_EpiLC\_dCD\_Otx2  
 GSM4694997 scRNAseq\_2i\_ESC  
 GSM4694998 scRNAseq\_d2\_EpiLC  
 GSM4694999 scRNAseq\_d1\_EpiLC  
 GSM4695000 scRNAseq\_d2\_EB  
 GSM4695001 scRNAseq\_EpiSC  
 GSM4695002 scRNAseq\_d4\_EB  
 GSM4695003 scRNAseq\_SL\_ESC  
 GSM4695004 scRNAseq\_d3\_EpiLC  
 GSM5034698 scRNAseq\_d4EB\_WT  
 GSM5034699 scRNAseq\_d4EB\_dCD  
 GSM5034700 ChIP\_H3K4me3\_ESC\_WT  
 GSM5034701 ChIP\_H3K4me3\_ESC\_dCD  
 GSM5034702 ChIP\_H3K4me3\_EpiLC\_WT  
 GSM5034703 ChIP\_H3K4me3\_EpiLC\_dCD  
 GSM5034704 ChIP\_H3K4me3\_EpiSC\_WT  
 GSM5034705 ChIP\_H3K4me3\_EpiSC\_dCD

Genome browser session  
(e.g. [UCSC](#))

Comparison of the pluripotent stages (related to Fig. 2):  
<http://genome-euro.ucsc.edu/s/Tore/Comparison%20of%20the%20pluripotent%20stages>

PRDM14/NANOG overexpression and topological features (related to Fig. 5):

[http://genome-euro.ucsc.edu/cgi-bin/hgTracks?](http://genome-euro.ucsc.edu/cgi-bin/hgTracks?hgS_doOtherUser=submit&hgS_otherUserName=Tore&hgS_otherUserSessionName=PRDM14%2FNANOG%20overexpression)

[hgS\\_doOtherUser=submit&hgS\\_otherUserName=Tore&hgS\\_otherUserSessionName=PRDM14%2FNANOG%20overexpression](http://genome-euro.ucsc.edu/cgi-bin/hgTracks?hgS_doOtherUser=submit&hgS_otherUserName=Tore&hgS_otherUserSessionName=PRDM14%2FNANOG%20overexpression)

H3K4me1/2 deficiency and Otx2-/- (related to Fig. 6,7):

[http://genome-euro.ucsc.edu/cgi-bin/hgTracks?](http://genome-euro.ucsc.edu/cgi-bin/hgTracks?hgS_doOtherUser=submit&hgS_otherUserName=Tore&hgS_otherUserSessionName=H3K4me1%2F%20deficiency%20and%20Otx2%2D%2F%2D)

[hgS\\_doOtherUser=submit&hgS\\_otherUserName=Tore&hgS\\_otherUserSessionName=H3K4me1%2F%20deficiency%20and%20Otx2%2D%2F%2D](http://genome-euro.ucsc.edu/cgi-bin/hgTracks?hgS_doOtherUser=submit&hgS_otherUserName=Tore&hgS_otherUserSessionName=H3K4me1%2F%20deficiency%20and%20Otx2%2D%2F%2D)

## Methodology

|                         |                                                                                                                                                                                                                                                                                                                                                                                                                                                                                                                                                                                                                                                                                                                                                                                                                                                 |
|-------------------------|-------------------------------------------------------------------------------------------------------------------------------------------------------------------------------------------------------------------------------------------------------------------------------------------------------------------------------------------------------------------------------------------------------------------------------------------------------------------------------------------------------------------------------------------------------------------------------------------------------------------------------------------------------------------------------------------------------------------------------------------------------------------------------------------------------------------------------------------------|
| Replicates              | <p>ATAC-seq experiments were performed in 2 replicates for each condition (ESC, EpiLC, EpiSC).</p> <p>H3K4me1 ChIP-seq experiments in ESC (n = 2), EpiLC (n = 4) and EpiSC (n = 2) performed in R1 and E14Tg2a cell lines.<br/> H3K4me2 ChIP-seq experiments in ESC (n = 2), EpiLC (n = 3) and EpiSC (n = 3) performed in R1 and E14Tg2a cell lines.<br/> H3K4me3 ChIP-seq experiments in ESC (n = 2), EpiLC (n = 2) and EpiSC (n = 2) performed in R1 and E14Tg2a cell lines.<br/> H3K27ac ChIP-seq experiments in ESC (n = 2), EpiLC (n = 4) and EpiSC (n=2) performed in R1 and E14Tg2a cell lines.<br/> NANOG-HA ChIP-seq experiments in EpiSC were performed as two biological replicates in E14Tg2a.</p> <p>RNA-seq experiments were performed in at least 2 replicates for each condition (EpiLC WT, EpiLC dCD, EpiSC WT, EpiSC dCD)</p> |
| Sequencing depth        | ChIP-seq experiments were performed with 1x50 bp with at least 30 million reads per sample.                                                                                                                                                                                                                                                                                                                                                                                                                                                                                                                                                                                                                                                                                                                                                     |
| Antibodies              | <p>Antibody Source ID Application Dilution</p> <p>H3K4me1 Active Motif 39297 ChIP-seq 4 µl</p> <p>H3K4me2 Active Motif 39141 ChIP-seq 4 µl</p> <p>H3K4me3 Active Motif 39159 ChIP-seq 4 µl</p> <p>H3K9me2 Active Motif 39683 ChIP-seq 5 µl</p> <p>H3K9me3 Active Motif 39161 ChIP-seq 5 µl</p> <p>H3K27ac Active Motif 39133 ChIP-seq 4 µl</p> <p>H3K27me2 Cell Signaling 9728S ChIP-seq 5 µl</p> <p>H3K27me3 Active Motif 39155 ChIP-seq 5 µl</p> <p>HA Abcam ab9110 ChIP-seq 4 µl</p>                                                                                                                                                                                                                                                                                                                                                         |
| Peak calling parameters | <p>Peaks were only called from H3K27ac ChIP-seq, including public H3K27ac ChIP-seq data of PGCLC (Kurimoto et al. 2016/ GEO accession: GSE60204).</p> <p>MACS2 were used to call peaks with the following setting --broad -m 5 50 --fix-bimodal --extsize 200</p>                                                                                                                                                                                                                                                                                                                                                                                                                                                                                                                                                                               |
| Data quality            | For the H3K27ac peaks in EpiLC, EpiSC and PGCLC only peaks with q-values < 1 x 10 <sup>-3</sup> were considered.                                                                                                                                                                                                                                                                                                                                                                                                                                                                                                                                                                                                                                                                                                                                |
| Software                | <p>Mapping (mm10): bwa mem aligner</p> <p>De-duplication: Picard tools-2.9.0-1</p> <p>Remove ENCODE blacklisted regions and big Wig files: deeptools-3.3.1</p> <p>All analysis code is publically available at Github: <a href="https://github.com/ToreBle/Germline_competence">https://github.com/ToreBle/Germline_competence</a></p>                                                                                                                                                                                                                                                                                                                                                                                                                                                                                                          |

## Flow Cytometry

### Plots

Confirm that:

- ☒ The axis labels state the marker and fluorochrome used (e.g. CD4-FITC).
- ☒ The axis scales are clearly visible. Include numbers along axes only for bottom left plot of group (a 'group' is an analysis of identical markers).
- ☒ All plots are contour plots with outliers or pseudocolor plots.
- ☒ A numerical value for number of cells or percentage (with statistics) is provided.

## Methodology

|                    |                                                                                                                                                                                                                                                                                                                   |
|--------------------|-------------------------------------------------------------------------------------------------------------------------------------------------------------------------------------------------------------------------------------------------------------------------------------------------------------------|
| Sample preparation | According to the protocol from Hayashi and Saitou, 2013, embryoid bodies (EB) containing primordial germ cell like cells (PGCLC) were dissociated and filtered into single cells using trypsin. Each measurement was performed at least for two biological replicates. More details are described in the methods. |
| Instrument         | FACS Canto Cytometer (PGCLC quantification) and FACS AriaIII cell sorter (PGCLC sorting)                                                                                                                                                                                                                          |
| Software           | <p>Data collection: BD FACSDiva Software version 5.0.3</p> <p>Data analysis: FlowJo 10.6.1</p>                                                                                                                                                                                                                    |

Cell population abundance

As described previously (Hayashi and Saitou, 2013), about 5 – 10 % of PGCLC were obtained as CD15+ CD61+.

Gating strategy

Initially the cell populations were identified with FSC-A (Area)/SSC-A (Area) plots. A polygon gate was used to separate the cells from debris. Then, in a FSC-H (Height) / FSC-A (Area) plot, single cells were selected and doublets were excluded. The boundaries for the PGCLC quantification were defined by single stained controls or control EB cells which were differentiated in the absence of BMP4 and thus did not induce PGCLC. The gating strategy is provided in Supplementary Figure 2f.

☒ Tick this box to confirm that a figure exemplifying the gating strategy is provided in the Supplementary Information.
